# Supplementary material for: Characterization of Depressive Symptoms Trajectories After Breast Cancer Diagnosis in Women in France
Source: PubMed Central journal article supplement (PMC9011125; doi:10.1001/jamanetworkopen.2022.5118), 2022-04-14
Supplement: jamanetwopen-e225118-s001.pdf [file jamanetwopen-e225118-s001.pdf]

## Supplementary Online Content

Charles C, Bardet A, Larive A, et al. Characterization of depressive symptoms trajectories after breast cancer diagnosis in women in France. *JAMA Netw Open*. 2022;5(4):e225118. doi:10.1001/jamanetworkopen.2022.5118

**eTable 1.** Comparison of Baseline Demographic and Clinical Characteristics Among Patients Included or Not in the CANTO-DEePRESS Study

**eTable 2.** Patterns of Missingness in HADS Questionnaire Completion Over Time (T0-T1-T2-T3) (n=4803)

**eTable 3.** Missingness in HADS Questionnaire Completion at T3 According to Literature-based Trajectories

**eTable 4.** Additional Psychological Information Regarding Missingness in the Completion of the HADS Questionnaire at T3

**eFigure.** Flowchart of CANTO-DEePRESS Study Population

**eTable 5.** Fit Indices from GBTM Approach to Identify Depressive Symptom Trajectory-Groups

**eTable 6.** Fit Indices from GBTM Approach to Identify Depressive Symptom Trajectory-Groups—Sensitivity Analysis With Dropout Management

**eTable 7.** Epidemiological Model Outcomes

**eTable 8.** Clinical Model Outcomes

**eTable 9.** Description of Baseline Patients' Characteristics Based on Trajectory Affiliation

This supplementary material has been provided by the authors to give readers additional information about their work.

**eTable 1.** Comparison of Baseline Demographic and Clinical Characteristics Among Patients Included or Not in the CANTO-DEePRESS Study

|                                   | <b>Patients included</b><br>(n=4803) | <b>Patients not included</b><br>(n=1816) | <b>All</b><br>(n=6619) |
|-----------------------------------|--------------------------------------|------------------------------------------|------------------------|
| <b>Characteristics</b>            | n (%)                                | n (%)                                    | n (%)                  |
| <b>Age (years)</b>                |                                      |                                          |                        |
| <40                               | 323 (6.7)                            | 129 (7.1)                                | 452 (6.8)              |
| [40-75]                           | 4314 (89.8)                          | 1578 (86.9)                              | 5892 (89.0)            |
| >75                               | 166 (3.5)                            | 109 (6.0)                                | 275 (4.2)              |
| <b>Working status</b>             |                                      |                                          |                        |
| Active                            | 2527 (52.6)                          | 707 (38.9)                               | 3234 (48.9)            |
| Inactive                          | 2218 (46.2)                          | 734 (40.4)                               | 2952 (44.6)            |
| Missing                           | 58 (1.2)                             | 375 (20.6)                               | 433 (6.5)              |
| <b>Monthly household income</b>   |                                      |                                          |                        |
| <1500                             | 620 (12.9)                           | 299 (16.5)                               | 919 (13.9)             |
| [1500-3000]                       | 1754 (36.5)                          | 530 (29.2)                               | 2284 (34.5)            |
| >3000                             | 1967 (41.0)                          | 442 (24.3)                               | 2409 (36.4)            |
| Missing                           | 462 (9.6)                            | 545 (30.0)                               | 1007 (15.2)            |
| <b>TNM stage</b>                  |                                      |                                          |                        |
| Stage I                           | 2441 (50.8)                          | 804 (44.3)                               | 3245 (49.0)            |
| Stage II                          | 1907 (39.7)                          | 793 (43.7)                               | 2700 (40.8)            |
| Stage III                         | 452 (9.4)                            | 189 (10.4)                               | 641 (9.7)              |
| Missing                           | 3 (0.1)                              | 30 (1.7)                                 | 33 (0.5)               |
| <b>Charlson comorbidity index</b> |                                      |                                          |                        |
| 0                                 | 3567 (74.3)                          | 1269 (69.9)                              | 4836 (73.1)            |
| 1                                 | 458 (9.5)                            | 218 (12.0)                               | 676 (10.2)             |
| ≥2                                | 434 (9.0)                            | 152 (8.4)                                | 586 (8.9)              |
| Missing                           | 344 (7.2)                            | 177 (9.7)                                | 521 (7.9)              |

|                                           | <b>Patients included</b><br>(n=4803) | <b>Patients not included</b><br>(n=1816) | <b>All</b><br>(n=6619) |
|-------------------------------------------|--------------------------------------|------------------------------------------|------------------------|
| <b>Characteristics</b>                    | n (%)                                | n (%)                                    | n (%)                  |
| <b>Pain</b>                               |                                      |                                          |                        |
| <40                                       | 4294 (89.4)                          | 1206 (66.4)                              | 5500 (83.1)            |
| ≥40                                       | 493 (10.3)                           | 215 (11.8)                               | 708 (10.7)             |
| Missing                                   | 16 (0.3)                             | 395 (21.8)                               | 411 (6.2)              |
| <b>Fatigue</b>                            |                                      |                                          |                        |
| <40                                       | 3649 (76.0)                          | 1010 (55.6)                              | 4659 (70.4)            |
| ≥40                                       | 1143 (23.8)                          | 414 (22.8)                               | 1557 (23.5)            |
| Missing                                   | 11 (0.2)                             | 392 (21.6)                               | 403 (6.1)              |
| <b>Former psychiatric hospitalization</b> |                                      |                                          |                        |
| Yes                                       | 131 (2.7)                            | 60 (3.3)                                 | 191 (2.9)              |
| No                                        | 4578 (95.3)                          | 1692 (93.2)                              | 6270 (94.7)            |
| Missing                                   | 94 (2.0)                             | 64 (3.5)                                 | 158 (2.4)              |
| <b>Depression (HADS-D)</b>                |                                      |                                          |                        |
| [0-7]                                     | 3946 (82.2)                          | 1049 (57.8)                              | 4995 (75.5)            |
| [8-10]                                    | 523 (10.9)                           | 173 (9.5)                                | 696 (10.5)             |
| ≥11                                       | 334 (7.0)                            | 97 (5.3)                                 | 431 (6.5)              |
| Missing                                   | 0 (0.0)                              | 497 (27.4)                               | 497 (7.5)              |
| <b>Anxiety (HADS-A)</b>                   |                                      |                                          |                        |
| [0-7]                                     | 1868 (38.9)                          | 516 (28.4)                               | 2384 (36.0)            |
| [8-10]                                    | 1279 (26.6)                          | 371 (20.4)                               | 1650 (24.9)            |
| ≥11                                       | 1651 (34.4)                          | 436 (24.0)                               | 2087 (31.5)            |
| Missing                                   | 5 (0.1)                              | 493 (27.1)                               | 498 (7.5)              |

Note: Percents were calculated using the total number of patients indicated at the top of each column.

**eTable 2.** Patterns of Missingness in HADS Questionnaire Completion Over Time (T0-T1-T2-T3) (n=4803)

| Pattern of missingness <sup>a</sup> | Proportion of patients<br>n (%) | Pattern of missingness | Proportion of patients<br>n (%) |
|-------------------------------------|---------------------------------|------------------------|---------------------------------|
| 0--0-0                              | 114 (2.37)                      | 1--0-0                 | 4 (0.08)                        |
| 0--0-1                              | 7 (0.15)                        | 1--0-1                 | 1 (0.02)                        |
| 0--1-0                              | 7 (0.15)                        | 1--1-1                 | 1 (0.02)                        |
| 0--1-1                              | 3 (0.06)                        | 1-0--0                 | 7 (0.15)                        |
| 0-0--0                              | 146 (3.04)                      | 1-0--1                 | 3 (0.06)                        |
| 0-0--1                              | 17 (0.35)                       | 1-0-0-                 | 67 (1.39)                       |
| 0-0-0-                              | 1361 (28.34)                    | 1-0-0-0                | 97 (2.02)                       |
| 0-0-0-0                             | 2407 (50.11)                    | 1-0-0-1                | 13 (0.27)                       |
| 0-0-0-1                             | 88 (1.83)                       | 1-0-1-                 | 14 (0.29)                       |
| 0-0-1-                              | 57 (1.19)                       | 1-0-1-0                | 14 (0.29)                       |
| 0-0-1-0                             | 58 (1.21)                       | 1-0-1-1                | 6 (0.12)                        |
| 0-0-1-1                             | 23 (0.48)                       | 1-1--0                 | 3 (0.06)                        |
| 0-1--0                              | 10 (0.21)                       | 1-1--1                 | 1 (0.02)                        |
| 0-1--1                              | 3 (0.06)                        | 1-1-0-                 | 14 (0.29)                       |
| 0-1-0-                              | 36 (0.75)                       | 1-1-0-0                | 14 (0.29)                       |
| 0-1-0-0                             | 54 (1.12)                       | 1-1-0-1                | 8 (0.17)                        |
| 0-1-0-1                             | 12 (0.25)                       | 1-1-1-                 | 27 (0.56)                       |
| 0-1-1-                              | 31 (0.65)                       | 1-1-1-0                | 10 (0.21)                       |
| 0-1-1-0                             | 18 (0.37)                       | 1-1-1-1                | 30 (0.62)                       |
| 0-1-1-1                             | 17 (0.35)                       | 1--0-0                 | 4 (0.08)                        |
|                                     |                                 | 1--0-1                 | 1 (0.02)                        |

<sup>a</sup> 0: HADS < 11; 1: HADS ≥ 11

Comments: eTable 2 shows patterns of missingness. When missingness was temporary and data reintroduced later during the study (missingness at a time other than T3), we considered that there was no major evidence for non-randomness of missingness.

**eTable 3.** Missingness in HADS Questionnaire Completion at T3 According to Literature-based Trajectories

|                      | <b>Proportion of patients<br/>n (%)</b> | <b>Proportion of patients<br/>with no missing data<br/>n (%)</b> |
|----------------------|-----------------------------------------|------------------------------------------------------------------|
| Total                | 4803                                    | 2869 (59.7%) <sup>a</sup>                                        |
| Non-cases trajectory | 4028 (83.9%) <sup>a</sup>               | 2407 (83.9%) <sup>b</sup>                                        |
| Delayed trajectory   | 441 (9.2%) <sup>a</sup>                 | 270 (9.4%) <sup>b</sup>                                          |
| Chronic trajectory   | 104 (2.2%) <sup>a</sup>                 | 57 (2.0%) <sup>b</sup>                                           |
| Recovery trajectory  | 230 (4.8%) <sup>a</sup>                 | 135 (4.7%) <sup>b</sup>                                          |

Note: Percents were calculated based on a) total study population (n=4803) or b) proportion of patients with no missing data.

Comments: Considering literature-based trajectories in n=2869 patients (59.7%) with fully completed HADS-D questionnaires, there was no major evidence for non-randomness of missingness.

**eTable 4.** Additional Psychological Information Regarding Missingness in the Completion of the HADS Questionnaire at T3

|                                     | Population with missing HADS questionnaire at T3 (n=1607) | Population with no missing HADS questionnaire at T3 (n=3196) |
|-------------------------------------|-----------------------------------------------------------|--------------------------------------------------------------|
| Variables (since last study visit)  | n (%)                                                     | n (%)                                                        |
| <b>Psychiatric hospitalizations</b> |                                                           |                                                              |
| No                                  | 1602 (99.7)                                               | 3174 (99.3)                                                  |
| Yes                                 | 5 (0.3)                                                   | 22 (0.7)                                                     |
| <b>Psychiatric consultations</b>    |                                                           |                                                              |
| No                                  | 1578 (98.2)                                               | 3031 (94.8)                                                  |
| Yes                                 | 29 (1.8)                                                  | 165 (5.2)                                                    |
| <b>Psychological consultations</b>  |                                                           |                                                              |
| No                                  | 1540 (95.8)                                               | 2972 (93.0)                                                  |
| Yes                                 | 67 (4.2)                                                  | 224 (7.0)                                                    |

Comments: Complementary variables were analyzed in order to better characterize missing data and to decide whether imputation was appropriate or not. There was no meaningful difference in psychological events (hospitalizations or consultations) when comparing patients with and without full data at T3.

**Conclusion about missing data: Missingness in HADS questionnaire completion was greater at T3. However, there was no major evidence for bias and therefore, no imputation was done.**

**eFigure.** Flowchart of CANTO-DEePRESS Study Population

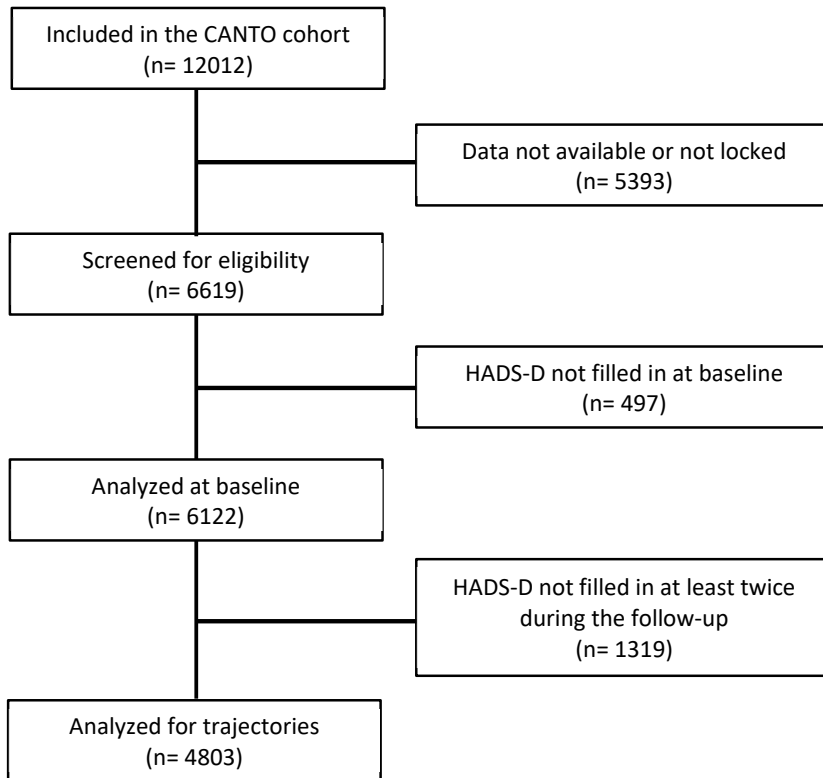

**Table 5.** Fit Indices from GBTM Approach to Identify Depressive Symptom Trajectory-Groups

| Model                                                     | BIC         | χ2     | Group 1 |      |       | Group 2 |      |       | Group 3 |      |       | Group 4 |       |       | Group 5 |       |       | Group 6 |       |       | Group 7 |       |       | Group 8 |       |       | Group 9 |       |       | Group 10 |     |       |   |     |      |   |   |   |   |   |   |   |   |   |   |   |   |   |
|-----------------------------------------------------------|-------------|--------|---------|------|-------|---------|------|-------|---------|------|-------|---------|-------|-------|---------|-------|-------|---------|-------|-------|---------|-------|-------|---------|-------|-------|---------|-------|-------|----------|-----|-------|---|-----|------|---|---|---|---|---|---|---|---|---|---|---|---|---|
|                                                           |             |        | n       | OCC  | AvPP  | n       | OCC  | AvPP  | n       | OCC  | AvPP  | n       | OCC   | AvPP  | n       | OCC   | AvPP  | n       | OCC   | AvPP  | n       | OCC   | AvPP  | n       | OCC   | AvPP  | n       | OCC   | AvPP  | n        | OCC | AvPP  | n | OCC | AvPP |   |   |   |   |   |   |   |   |   |   |   |   |   |
| 2 trajectories with linear polynomial functional form     | -42834,9977 | P<.001 | 3375    | 9,1  | 95,5% | 1428    | 23,4 | 91,0% | .       | .    | .     | .       | .     | .     | .       | .     | .     | .       | .     | .     | .       | .     | .     | .       | .     | .     | .       | .     | .     | .        | .   | .     | . | .   | .    | . | . | . | . | . |   |   |   |   |   |   |   |   |
| 3 trajectories with linear polynomial functional form     | -42302,4271 | P<.001 | 2614    | 9,1  | 91,3% | 1791    | 10,0 | 85,9% | 398     | 75,4 | 87,8% | .       | .     | .     | .       | .     | .     | .       | .     | .     | .       | .     | .     | .       | .     | .     | .       | .     | .     | .        | .   | .     | . | .   | .    | . | . | . | . | . |   |   |   |   |   |   |   |   |
| 4 trajectories with linear polynomial functional form     | -42135,3325 | P<.001 | 1507    | 9,9  | 82,0% | 2088    | 4,9  | 78,1% | 1026    | 19,5 | 84,7% | 182     | 187,9 | 88,8% | .       | .     | .     | .       | .     | .     | .       | .     | .     | .       | .     | .     | .       | .     | .     | .        | .   | .     | . | .   | .    | . | . | . | . | . | . |   |   |   |   |   |   |   |
| 5 trajectories with linear polynomial functional form     | -42063,6995 | P<.001 | 1323    | 10,9 | 81,0% | 2158    | 4,6  | 77,2% | 411     | 16,8 | 67,6% | 710     | 15,9  | 72,6% | 201     | 167,3 | 88,3% | .       | .     | .     | .       | .     | .     | .       | .     | .     | .       | .     | .     | .        | .   | .     | . | .   | .    | . | . | . | . | . | . |   |   |   |   |   |   |   |
| 6 trajectories with linear polynomial functional form     | -42036,5743 | P<.001 | 219     | 40,2 | 72,0% | 2093    | 5,7  | 80,0% | 1468    | 5,5  | 69,9% | 273     | 25,0  | 67,9% | 575     | 19,2  | 72,2% | 175     | 167,4 | 86,4% | .       | .     | .     | .       | .     | .     | .       | .     | .     | .        | .   | .     | . | .   | .    | . | . | . | . | . | . |   |   |   |   |   |   |   |
| 7 trajectories with linear polynomial functional form     | -42013,5929 | P<.001 | 267     | 34,0 | 70,1% | 2146    | 5,4  | 79,1% | 1114    | 5,0  | 59,8% | 380     | 13,9  | 62,2% | 321     | 25,8  | 65,9% | 452     | 16,5  | 63,6% | 123     | 207,8 | 84,4% | .       | .     | .     | .       | .     | .     | .        | .   | .     | . | .   | .    | . | . | . | . | . | . | . |   |   |   |   |   |   |
| 8 trajectories with linear polynomial functional form     | -42013,6447 | P<.001 | 157     | 58,7 | 76,2% | 1895    | 5,6  | 76,2% | 1249    | 4,3  | 58,7% | 306     | 16,7  | 58,2% | 567     | 10,9  | 61,2% | 63      | 87,4  | 65,4% | 452     | 19,7  | 65,2% | 114     | 239,7 | 85,6% | .       | .     | .     | .        | .   | .     | . | .   | .    | . | . | . | . | . | . | . | . |   |   |   |   |   |
| 9 trajectories with linear polynomial functional form     | -42028,2795 | P<.001 | 282     | 28,9 | 61,2% | 0       | .    | .     | 1562    | 3,2  | 45,3% | 1457    | 3,9   | 56,2% | 567     | 10,9  | 61,2% | 63      | 87,4  | 65,4% | 452     | 19,7  | 65,2% | 306     | 16,7  | 58,2% | 114     | 239,7 | 85,6% | .        | .   | .     | . | .   | .    | . | . | . | . | . | . | . | . | . |   |   |   |   |
| 10 trajectories with linear polynomial functional form    | -42008,8416 | P<.001 | 229     | 40,0 | 72,2% | 1231    | 4,6  | 58,8% | 2053    | 5,6  | 78,6% | 123     | 24,5  | 56,1% | 166     | 27,0  | 64,5% | 737     | 13,1  | 66,6% | 55      | 94,7  | 65,6% | 26      | 295,1 | 71,5% | 159     | 86,5  | 74,1% | 24       | 879 | 83,8% | . | .   | .    | . | . | . | . | . | . | . | . | . |   |   |   |   |
| 2 trajectories with quadratic polynomial functional form  | -42836,2747 | P<.001 | 3378    | 9,1  | 95,5% | 1425    | 23,4 | 91,0% | .       | .    | .     | .       | .     | .     | .       | .     | .     | .       | .     | .     | .       | .     | .     | .       | .     | .     | .       | .     | .     | .        | .   | .     | . | .   | .    | . | . | . | . | . | . | . | . |   |   |   |   |   |
| 3 trajectories with quadratic polynomial functional form  | -42307,0929 | P<.001 | 2592    | 9,4  | 91,5% | 1806    | 9,7  | 85,6% | 405     | 74,4 | 87,9% | .       | .     | .     | .       | .     | .     | .       | .     | .     | .       | .     | .     | .       | .     | .     | .       | .     | .     | .        | .   | .     | . | .   | .    | . | . | . | . | . | . | . | . | . | . | . |   |   |
| 4 trajectories with quadratic polynomial functional form  | -42143,2603 | P<.001 | 1526    | 10,0 | 82,6% | 2067    | 5,0  | 78,3% | 1030    | 18,7 | 83,9% | 180     | 190,3 | 88,9% | .       | .     | .     | .       | .     | .     | .       | .     | .     | .       | .     | .     | .       | .     | .     | .        | .   | .     | . | .   | .    | . | . | . | . | . | . | . | . | . | . | . |   |   |
| 5 trajectories with quadratic polynomial functional form  | -42011,3618 | P<.001 | 1386    | 11,0 | 82,2% | 2101    | 5,0  | 78,2% | 675     | 18,5 | 75,8% | 425     | 24,3  | 72,6% | 216     | 156,9 | 88,3% | .       | .     | .     | .       | .     | .     | .       | .     | .     | .       | .     | .     | .        | .   | .     | . | .   | .    | . | . | . | . | . | . | . | . | . | . | . |   |   |
| 6 trajectories with quadratic polynomial functional form  | -41960,5454 | P<.001 | 602     | 19,9 | 77,1% | 2299    | 5,0  | 80,2% | 888     | 10,1 | 70,1% | 464     | 31,1  | 77,4% | 427     | 24,0  | 71,8% | 123     | 225,6 | 85,9% | .       | .     | .     | .       | .     | .     | .       | .     | .     | .        | .   | .     | . | .   | .    | . | . | . | . | . | . | . | . | . | . | . |   |   |
| 7 trajectories with quadratic polynomial functional form  | -41927,3299 | P<.001 | 366     | 30,9 | 77,1% | 2270    | 5,4  | 80,6% | 1105    | 8,2  | 71,2% | 154     | 62,0  | 72,2% | 507     | 23,4  | 73,1% | 253     | 34,0  | 69,0% | 148     | 192,6 | 85,9% | .       | .     | .     | .       | .     | .     | .        | .   | .     | . | .   | .    | . | . | . | . | . | . | . | . | . | . | . |   |   |
| 8 trajectories with quadratic polynomial functional form  | -41916,9536 | P<.001 | 381     | 30,7 | 77,8% | 2284    | 5,3  | 80,1% | 1059    | 7,8  | 67,7% | 75      | 66,1  | 68,8% | 162     | 60,6  | 71,6% | 223     | 39,9  | 69,6% | 472     | 25,0  | 73,2% | 147     | 183,7 | 84,9% | .       | .     | .     | .        | .   | .     | . | .   | .    | . | . | . | . | . | . | . | . | . | . | . |   |   |
| 9 trajectories with quadratic polynomial functional form  | -41911,2005 | P<.001 | 357     | 31,9 | 76,7% | 1053    | 7,3  | 66,4% | 2214    | 5,5  | 80,0% | 524     | 19,8  | 70,1% | 82      | 60,0  | 67,3% | 202     | 43,7  | 69,5% | 169     | 60,4  | 72,5% | 177     | 101,0 | 79,3% | 25      | 988,4 | 86,7% | .        | .   | .     | . | .   | .    | . | . | . | . | . | . | . | . | . | . | . | . |   |
| 10 trajectories with quadratic polynomial functional form | -41920,4054 | P<.001 | 153     | 58,6 | 74,2% | 1507    | 5,6  | 68,9% | 1194    | 4,1  | 56,8% | 763     | 8,8   | 61,1% | 88      | 57,5  | 67,3% | 122     | 77,0  | 71,2% | 306     | 23,9  | 65,2% | 497     | 23,7  | 72,6% | 29      | 391,5 | 71,9% | 144      | 190 | 85,1% | . | .   | .    | . | . | . | . | . | . | . | . | . | . | . |   |   |
| 2 trajectories with cubic polynomial functional form      | -42844,2529 | 0,2    | 3382    | 9,0  | 95,4% | 1421    | 23,6 | 91,1% | .       | .    | .     | .       | .     | .     | .       | .     | .     | .       | .     | .     | .       | .     | .     | .       | .     | .     | .       | .     | .     | .        | .   | .     | . | .   | .    | . | . | . | . | . | . | . | . | . | . |   |   |   |
| 3 trajectories with cubic polynomial functional form      | -42319,6722 | 0,2    | 2586    | 9,3  | 91,4% | 1811    | 9,6  | 85,4% | 406     | 76,6 | 88,4% | .       | .     | .     | .       | .     | .     | .       | .     | .     | .       | .     | .     | .       | .     | .     | .       | .     | .     | .        | .   | .     | . | .   | .    | . | . | . | . | . | . | . | . | . | . |   |   |   |
| 4 trajectories with cubic polynomial functional form      | -42154,9325 | 0,004  | 1601    | 9,8  | 83,3% | 2040    | 5,1  | 78,3% | 981     | 20,0 | 84,3% | 181     | 175,5 | 87,8% | .       | .     | .     | .       | .     | .     | .       | .     | .     | .       | .     | .     | .       | .     | .     | .        | .   | .     | . | .   | .    | . | . | . | . | . | . | . | . | . | . |   |   |   |
| 5 trajectories with cubic polynomial functional form      | -41971,3883 | P<.001 | 1428    | 11,0 | 82,6% | 2015    | 5,3  | 78,1% | 866     | 19,0 | 80,6% | 277     | 45,1  | 76,8% | 217     | 155,6 | 88,2% | .       | .     | .     | .       | .     | .     | .       | .     | .     | .       | .     | .     | .        | .   | .     | . | .   | .    | . | . | . | . | . | . | . | . | . | . | . |   |   |
| 6 trajectories with cubic polynomial functional form      | -41907,9131 | P<.001 | 576     | 20,4 | 76,0% | 2242    | 5,3  | 80,5% | 946     | 9,9  | 71,4% | 555     | 27,8  | 78,5% | 343     | 37,7  | 76,8% | 141     | 233,5 | 88,1% | .       | .     | .     | .       | .     | .     | .       | .     | .     | .        | .   | .     | . | .   | .    | . | . | . | . | . | . | . | . | . | . | . |   |   |
| 7 trajectories with cubic polynomial functional form      | -41855,7866 | P<.001 | 437     | 26,1 | 76,1% | 2197    | 5,7  | 80,8% | 200     | 54,7 | 73,0% | 1076    | 9,3   | 72,9% | 480     | 25,3  | 74,1% | 261     | 40,9  | 72,7% | 152     | 209,2 | 87,1% | .       | .     | .     | .       | .     | .     | .        | .   | .     | . | .   | .    | . | . | . | . | . | . | . | . | . | . | . |   |   |
| 8 trajectories with cubic polynomial functional form      | -41825,1996 | P<.001 | 494     | 23,8 | 75,6% | 116     | 56,6 | 65,0% | 2141    | 5,9  | 81,1% | 1017    | 9,7   | 72,0% | 294     | 37,2  | 72,9% | 184     | 54,9  | 70,4% | 414     | 28,9  | 72,9% | 143     | 212,1 | 86,4% | .       | .     | .     | .        | .   | .     | . | .   | .    | . | . | . | . | . | . | . | . | . | . | . |   |   |
| 9 trajectories with cubic polynomial functional form      | -41817,2622 | P<.001 | 365     | 32,9 | 78,0% | 2146    | 5,8  | 80,1% | 1053    | 8,0  | 68,7% | 141     | 48,1  | 65,1% | 142     | 57,2  | 69,7% | 77      | 129,4 | 72,1% | 482     | 25,7  | 72,7% | 271     | 42,9  | 74,5% | 126     | 244,2 | 86,6% | .        | .   | .     | . | .   | .    | . | . | . | . | . | . | . | . | . | . | . |   |   |
| 10 trajectories with cubic polynomial functional form     | -41778,8397 | P<.001 | 375     | 32,9 | 78,4% | 948     | 8,9  | 67,3% | 2136    | 5,9  | 80,0% | 509     | 25,2  | 74,2% | 106     | 56,3  | 69,3% | 64      | 141,3 | 71,9% | 143     | 81,0  | 73,7% | 331     | 31,3  | 72,2% | 37      | 544,6 | 84,0% | 154      | 241 | 88,8% | . | .   | .    | . | . | . | . | . | . | . | . | . | . | . | . | . |

BIC: Bayesian Information Criterion based on the number of observations (to maximize) / X<sup>2</sup>: P value for Chi-square test of nullity of higher degree terms / n: number of patients

Comments: The predefined statistical criteria for choice of optimal trajectory-groups classification are: Chi-square test for functional form with p value <0,05, BIC to maximize, Average group Posterior Probabilities (AvPP) >70.0%, and Odds of Correct Classification (OCC) ≥5.

Conclusion: There is a requirement of cubic functional form from a classification into 4 groups, the optimal average posterior probability is for 7 trajectories or less, and BIC criteria is in favor of high numbers of trajectories. The other statistical criteria are not discriminant.



**Table 6.** Fit Indices from GBTM Approach to Identify Depressive Symptom Trajectory-Groups—Sensitivity Analysis With Dropout Management

| Model                                                     | BIC          | $\chi^2$ | Group 1 |      |       | Group 2 |      |       | Group 3 |      |       | Group 4 |       |       | Group 5 |       |       | Group 6 |       |       | Group 7 |       |       | Group 8 |       |       | Group 9 |       |       | Group 10 |       |       |   |   |   |
|-----------------------------------------------------------|--------------|----------|---------|------|-------|---------|------|-------|---------|------|-------|---------|-------|-------|---------|-------|-------|---------|-------|-------|---------|-------|-------|---------|-------|-------|---------|-------|-------|----------|-------|-------|---|---|---|
|                                                           |              |          | n       | OCC  | AvPP  | n       | OCC  | AvPP  | n       | OCC  | AvPP  | n       | OCC   | AvPP  | n       | OCC   | AvPP  | n       | OCC   | AvPP  | n       | OCC   | AvPP  | n       | OCC   | AvPP  | n       | OCC   | AvPP  | n        | OCC   | AvPP  |   |   |   |
| 2 trajectories with linear polynomial functional form     | -47124,68820 | P<.001   | 3383    | 8,9  | 95,4% | 1420    | 24,0 | 91,2% | .       | .    | .     | .       | .     | .     | .       | .     | .     | .       | .     | .     | .       | .     | .     | .       | .     | .     | .       | .     | .     | .        | .     | .     | . | . |   |
| 3 trajectories with linear polynomial functional form     | -46606,46310 | P<.001   | 2611    | 9,3  | 91,5% | 1806    | 9,8  | 85,6% | 386     | 82,6 | 88,7% | .       | .     | .     | .       | .     | .     | .       | .     | .     | .       | .     | .     | .       | .     | .     | .       | .     | .     | .        | .     | .     | . | . |   |
| 4 trajectories with linear polynomial functional form     | -46453,73090 | P<.001   | 1500    | 9,8  | 81,9% | 2091    | 4,9  | 78,2% | 1027    | 19,6 | 84,8% | 185     | 176,9 | 88,2% | .       | .     | .     | .       | .     | .     | .       | .     | .     | .       | .     | .     | .       | .     | .     | .        | .     | .     | . | . |   |
| 5 trajectories with linear polynomial functional form     | -46349,8958  | P<.001   | 1327    | 11,2 | 81,7% | 2153    | 5,0  | 78,6% | 578     | 18,5 | 72,9% | 520     | 21,7  | 73,8% | 225     | 159,7 | 88,9% | .       | .     | .     | .       | .     | .     | .       | .     | .     | .       | .     | .     | .        | .     | .     | . | . |   |
| 6 trajectories with linear polynomial functional form     | -46308,01290 | P<.001   | 730     | 17,4 | 78,8% | 2318    | 4,8  | 79,5% | 703     | 12,7 | 69,8% | 421     | 32,9  | 75,7% | 524     | 19,8  | 71,8% | 107     | 298,5 | 88,1% | .       | .     | .     | .       | .     | .     | .       | .     | .     | .        | .     | .     | . | . |   |
| 7 trajectories with linear polynomial functional form     | -46293,88060 | P<.001   | 383     | 29,3 | 76,7% | 2352    | 5,3  | 81,0% | 440     | 13,7 | 63,4% | 813     | 10,9  | 68,6% | 213     | 47,3  | 70,0% | 461     | 25,2  | 73,1% | 141     | 242,8 | 88,2% | .       | .     | .     | .       | .     | .     | .        | .     | .     | . | . |   |
| 8 trajectories with linear polynomial functional form     | -46297,74800 | P<.001   | 388     | 29,7 | 77,7% | 2351    | 5,3  | 80,8% | 485     | 13,5 | 64,4% | 33      | 295,3 | 72,4% | 732     | 12,0  | 68,6% | 162     | 61,0  | 69,5% | 519     | 20,6  | 70,8% | 133     | 256,3 | 88,2% | .       | .     | .     | .        | .     | .     | . | . |   |
| 9 trajectories with linear polynomial functional form     | -46303,66610 | P<.001   | 195     | 47,4 | 73,6% | 1876    | 5,8  | 76,3% | 217     | 32,3 | 61,0% | 1099    | 5,9   | 64,9% | 631     | 13,0  | 65,5% | 102     | 85,4  | 66,7% | 313     | 26,0  | 65,6% | 270     | 37,9  | 70,5% | 100     | 265,9 | 85,2% | .        | .     | .     | . | . |   |
| 10 trajectories with linear polynomial functional form    | -46332,93560 | P<.001   | 294     | 29,4 | 63,4% | 0       | .    | .     | 1564    | 3,5  | 49,5% | 1308    | 5,0   | 61,3% | 221     | 31,6  | 60,6% | 631     | 13,0  | 65,5% | 102     | 85,4  | 66,7% | 313     | 26,0  | 65,6% | 270     | 37,9  | 70,5% | 100      | 265,9 | 85,2% | . | . | . |
| 2 trajectories with quadratic polynomial functional form  | -47125,37030 | P<.001   | 3386    | 8,9  | 95,4% | 1417    | 24,1 | 91,2% | .       | .    | .     | .       | .     | .     | .       | .     | .     | .       | .     | .     | .       | .     | .     | .       | .     | .     | .       | .     | .     | .        | .     | .     | . | . |   |
| 3 trajectories with quadratic polynomial functional form  | -46609,91480 | P<.001   | 2601    | 9,5  | 91,6% | 1811    | 9,7  | 85,5% | 391     | 82,7 | 88,9% | .       | .     | .     | .       | .     | .     | .       | .     | .     | .       | .     | .     | .       | .     | .     | .       | .     | .     | .        | .     | .     | . | . |   |
| 4 trajectories with quadratic polynomial functional form  | -46459,85070 | P<.001   | 1520    | 10,1 | 82,7% | 2077    | 5,0  | 78,4% | 1022    | 19,0 | 84,0% | 184     | 176,1 | 88,2% | .       | .     | .     | .       | .     | .     | .       | .     | .     | .       | .     | .     | .       | .     | .     | .        | .     | .     | . | . |   |
| 5 trajectories with quadratic polynomial functional form  | -46236,82360 | P<.001   | 1316    | 11,4 | 81,8% | 2094    | 5,2  | 78,7% | 687     | 21,7 | 78,9% | 463     | 27,3  | 75,9% | 243     | 153,0 | 89,2% | .       | .     | .     | .       | .     | .     | .       | .     | .     | .       | .     | .     | .        | .     | .     | . | . |   |
| 6 trajectories with quadratic polynomial functional form  | -46171,42090 | P<.001   | 636     | 18,5 | 76,2% | 2208    | 5,4  | 80,5% | 784     | 12,7 | 72,4% | 477     | 31,5  | 77,5% | 547     | 24,2  | 75,9% | 151     | 215,8 | 88,1% | .       | .     | .     | .       | .     | .     | .       | .     | .     | .        | .     | .     | . | . |   |
| 7 trajectories with quadratic polynomial functional form  | -46122,06970 | P<.001   | 336     | 32,3 | 74,7% | 2171    | 6,2  | 82,1% | 452     | 18,1 | 68,0% | 914     | 10,9  | 72,1% | 409     | 32,3  | 75,4% | 349     | 34,8  | 74,0% | 172     | 185,9 | 87,2% | .       | .     | .     | .       | .     | .     | .        | .     | .     | . |   |   |
| 8 trajectories with quadratic polynomial functional form  | -46110,69740 | P<.001   | 344     | 33,8 | 77,2% | 2195    | 6,2  | 81,9% | 426     | 19,8 | 68,3% | 756     | 10,4  | 65,5% | 211     | 32,1  | 62,5% | 351     | 37,0  | 75,4% | 359     | 34,9  | 74,0% | 161     | 208,0 | 87,9% | .       | .     | .     | .        | .     | .     | . | . |   |
| 9 trajectories with quadratic polynomial functional form  | -46136,85120 | P<.001   | 139     | 66,9 | 64,5% | 220     | 32,1 | 63,7% | 2110    | 7,0  | 83,6% | 910     | 11,1  | 72,0% | 471     | 18,6  | 69,3% | 101     | 99,1  | 73,3% | 514     | 19,5  | 68,8% | 166     | 66,8  | 73,7% | 172     | 205,6 | 88,5% | .        | .     | .     | . | . |   |
| 10 trajectories with quadratic polynomial functional form | -46119,63710 | P<.001   | 270     | 38,3 | 70,5% | 99      | 25,2 | 55,5% | 2058    | 5,6  | 77,6% | 481     | 18,4  | 68,5% | 201     | 32,6  | 62,6% | 437     | 28,5  | 73,9% | 356     | 35,8  | 74,1% | 693     | 9,9   | 62,9% | 141     | 129,9 | 80,7% | 67       | 319,0 | 82,0% | . | . | . |
| 2 trajectories with cubic polynomial functional form      | -47132,85060 | 0,10     | 3391    | 8,9  | 95,4% | 1412    | 24,3 | 91,3% | .       | .    | .     | .       | .     | .     | .       | .     | .     | .       | .     | .     | .       | .     | .     | .       | .     | .     | .       | .     | .     | .        | .     | .     | . | . |   |
| 3 trajectories with cubic polynomial functional form      | -46622,50960 | 0,25     | 2593    | 9,5  | 91,6% | 1811    | 9,7  | 85,5% | 399     | 79,4 | 88,6% | .       | .     | .     | .       | .     | .     | .       | .     | .     | .       | .     | .     | .       | .     | .     | .       | .     | .     | .        | .     | .     | . | . |   |
| 4 trajectories with cubic polynomial functional form      | -46364,46230 | P<.001   | 2661    | 10,6 | 92,6% | 541     | 23,1 | 76,8% | 1204    | 11,8 | 79,7% | 397     | 86,2  | 88,8% | .       | .     | .     | .       | .     | .     | .       | .     | .     | .       | .     | .     | .       | .     | .     | .        | .     | .     | . | . |   |
| 5 trajectories with cubic polynomial functional form      | -46182,06140 | P<.001   | 1216    | 11,9 | 80,8% | 2079    | 5,3  | 78,9% | 795     | 20,6 | 80,5% | 452     | 29,8  | 77,1% | 261     | 132,6 | 88,4% | .       | .     | .     | .       | .     | .     | .       | .     | .     | .       | .     | .     | .        | .     | .     | . | . |   |
| 6 trajectories with cubic polynomial functional form      | -46090,75230 | P<.001   | 707     | 17,7 | 77,7% | 812     | 13,0 | 73,7% | 2073    | 5,4  | 78,5% | 515     | 30,7  | 78,5% | 529     | 26,7  | 77,3% | 167     | 208,5 | 88,7% | .       | .     | .     | .       | .     | .     | .       | .     | .     | .        | .     | .     | . | . |   |
| 7 trajectories with cubic polynomial functional form      | -46025,40100 | P<.001   | 1808    | 11,3 | 86,6% | 1206    | 7,1  | 69,8% | 410     | 26,5 | 73,7% | 508     | 30,8  | 78,6% | 318     | 26,5  | 67,7% | 368     | 37,1  | 75,3% | 185     | 215,4 | 89,6% | .       | .     | .     | .       | .     | .     | .        | .     | .     | . |   |   |
| 8 trajectories with cubic polynomial functional form      | -45955,75600 | P<.001   | 496     | 24,1 | 75,3% | 2093    | 6,5  | 82,0% | 425     | 18,2 | 65,6% | 393     | 29,2  | 73,4% | 635     | 15,8  | 70,9% | 305     | 49,0  | 77,3% | 313     | 48,3  | 77,5% | 143     | 254,5 | 88,9% | .       | .     | .     | .        | .     | .     | . | . |   |
| 9 trajectories with cubic polynomial functional form      | -46025,62460 | P<.001   | 808     | 13,7 | 71,1% | 317     | 22,6 | 65,7% | 1501    | 5,6  | 67,6% | 628     | 16,4  | 72,0% | 271     | 22,4  | 69,5% | 350     | 40,1  | 76,1% | 300     | 26,5  | 66,1% | 460     | 29,6  | 75,6% | 168     | 209,8 | 88,7% | .        | .     | .     | . | . |   |
| 10 trajectories with cubic polynomial functional form     | -45911,83000 | P<.001   | 327     | 41,4 | 76,9% | 229     | 32,1 | 69,0% | 1888    | 6,4  | 78,0% | 771     | 12,1  | 69,0% | 388     | 31,6  | 74,9% | 290     | 32,0  | 69,3% | 270     | 41,2  | 71,8% | 143     | 77,9  | 73,1% | 331     | 47,8  | 78,3% | 166      | 228,6 | 89,0% | . | . | . |

BIC: Bayesian Information Criterion based on the number of observations (to maximize) /  $\chi^2$ : P value for Chi-square test of nullity of higher degree terms / n: number of patients

**eTable 7.** Epidemiological Model Outcomes

| <b>Variables<sup>a</sup></b>        | <b>P value<sup>b</sup></b> |
|-------------------------------------|----------------------------|
| Having children                     | 0.002                      |
| Occupational class                  | 0.004                      |
| Household income                    | <.001                      |
| Familial history of breast cancer   | <.001                      |
| Former psychiatric hospitalizations | <.001                      |
| Cancer stage                        | 0.040                      |
| Body Mass Index                     | <.001                      |
| Smoking status                      | <.001                      |
| Level of physical activity          | <.001                      |

<sup>a</sup> Variables included in the model as covariates were: age (< 40; [40-75]; > 75), marital status, having children, level of education, working status, occupational category, household income, personal and familial history of cancer, former psychiatric hospitalizations, tumor stage and subtype, Charlson comorbidity index, menopausal status, Body Mass Index, smoking status, alcohol consumption, level of physical activity.

<sup>b</sup> Wald nullity test

**eTable 8.** Clinical Model Outcomes

| <b>Variables<sup>a</sup></b> | <b>P value<sup>b</sup></b> |
|------------------------------|----------------------------|
| Pain                         | 0.05                       |
| Fatigue                      | <.001                      |
| HADS-D score (depression)    | <.001                      |

<sup>a</sup> Variables included in the model as covariates were: pain, fatigue, insomnia, satisfaction with body image, and level of depression (HADS-D, continuous score) at baseline.

<sup>b</sup> Wald nullity test

**eTable 9.** Description of Baseline Patients' Characteristics Based on Trajectory Affiliation

| Characteristics              | Non-cases                | Delayed occurrence     | Intermediate worsening   | Intermediate improving | Remission              | Stable depression      | All             |
|------------------------------|--------------------------|------------------------|--------------------------|------------------------|------------------------|------------------------|-----------------|
|                              | <b>N = 2634 (54.84%)</b> | <b>N = 200 (4.16%)</b> | <b>N = 1076 (22.40%)</b> | <b>N = 480 (9.99%)</b> | <b>N = 261 (5.43%)</b> | <b>N = 152 (3.16%)</b> | <b>N = 4803</b> |
| <b>Demographic factors</b>   |                          |                        |                          |                        |                        |                        |                 |
| <b>Age</b>                   |                          |                        |                          |                        |                        |                        |                 |
| Mean (SD)                    | 56.4 (11.2)              | 57.5 (10.5)            | 56.3 (11.3)              | 56.2 (11.4)            | 52.9 (11.1)            | 56.8 (11.0)            | 56.2 (11.2)     |
| Range                        | [22.0-88.0]              | [29.0-85.0]            | [26.0-86.0]              | [30.0-88.0]            | [25.0-82.0]            | [34.0-84.0]            | [22.0-88.0]     |
| <b>Marital status</b>        |                          |                        |                          |                        |                        |                        |                 |
| Partnered                    | 1915 (72.7%)             | 135 (68.0%)            | 746 (69.3%)              | 325 (67.7%)            | 180 (69.0%)            | 98 (64.5%)             | 3400 (70.8%)    |
| Not partnered                | 614 (23.3%)              | 52 (26.0%)             | 274 (25.5%)              | 127 (26.5%)            | 73 (28.0%)             | 41 (27.0%)             | 1181 (24.6%)    |
| Missing                      | 105 (4.0%)               | 12 (6.0%)              | 56 (5.2%)                | 28 (5.8%)              | 8 (3.1%)               | 13 (8.6%)              | 222 (4.6%)      |
| <b>Dependent children</b>    |                          |                        |                          |                        |                        |                        |                 |
| 0                            | 1316 (50.0%)             | 89 (44.5%)             | 503 (46.7%)              | 228 (47.5%)            | 100 (38.3%)            | 70 (46.1%)             | 2306 (48.0%)    |
| 1+                           | 974 (37.0%)              | 80 (40.0%)             | 386 (35.9%)              | 180 (37.5%)            | 132 (50.6%)            | 51 (33.6%)             | 1803 (37.5%)    |
| Missing                      | 344 (13.1%)              | 31 (15.5%)             | 187 (17.4%)              | 72 (15.0%)             | 29 (11.1%)             | 31 (20.4%)             | 694 (14.4%)     |
| <b>Social factors</b>        |                          |                        |                          |                        |                        |                        |                 |
| <b>Level of education</b>    |                          |                        |                          |                        |                        |                        |                 |
| Primary school               | 323 (12.3%)              | 43 (21.5%)             | 160 (14.9%)              | 91 (19.0%)             | 24 (9.2%)              | 32 (21.1%)             | 673 (14.0%)     |
| High school                  | 1156 (43.9%)             | 100 (50.0%)            | 507 (47.1%)              | 237 (49.4%)            | 125 (47.9%)            | 74 (48.7%)             | 2199 (45.8%)    |
| College or higher            | 1088 (41.3%)             | 52 (26.0%)             | 372 (34.6%)              | 136 (28.3%)            | 105 (40.2%)            | 40 (26.3%)             | 1793 (37.3%)    |
| Missing                      | 67 (2.5%)                | 5 (2.5%)               | 37 (3.4%)                | 16 (3.3%)              | 7 (2.7%)               | 6 (3.9%)               | 138 (2.9%)      |
| <b>Working status</b>        |                          |                        |                          |                        |                        |                        |                 |
| Active                       | 1373 (52.1%)             | 100 (50.0%)            | 572 (53.2%)              | 245 (51%)              | 161 (61.7%)            | 76 (50.0%)             | 2527 (52.6%)    |
| Inactive                     | 1230 (46.7%)             | 98 (49.0%)             | 488 (45.4%)              | 231 (48.1%)            | 97 (37.2%)             | 74 (48.7%)             | 2218 (46.2%)    |
| Missing                      | 31 (1.2%)                | 2 (1.0%)               | 16 (1.5%)                | 4 (0.8%)               | 3 (1.1%)               | 2 (1.3%)               | 58 (1.2%)       |
| <b>Occupational category</b> |                          |                        |                          |                        |                        |                        |                 |
| Self-employed                | 177 (6.7%)               | 15 (7.5%)              | 83 (7.7%)                | 37 (7.7%)              | 18 (6.9%)              | 12 (7.9%)              | 342 (7.1%)      |
| Manual workers               | 165 (6.3%)               | 30 (15%)               | 96 (8.9%)                | 58 (12.1%)             | 13 (5%)                | 16 (10.5%)             | 378 (7.9%)      |
| Technicians                  | 626 (23.8%)              | 29 (14.5%)             | 244 (22.7%)              | 100 (20.8%)            | 71 (27.2%)             | 23 (15.1%)             | 1093 (22.8%)    |
| Clerks                       | 860 (32.6%)              | 77 (38.5%)             | 395 (36.7%)              | 195 (40.6%)            | 104 (39.8%)            | 68 (44.7%)             | 1699 (35.4%)    |

|                                  |             |          |             |            |            |            |              |
|----------------------------------|-------------|----------|-------------|------------|------------|------------|--------------|
| Manager, intellectual profession | 661 (25.1%) | 32 (16%) | 201 (18.7%) | 66 (13.8%) | 43 (16.5%) | 26 (17.1%) | 1029 (21.4%) |
| Undefined                        | 84 (3.2%)   | 12 (6%)  | 25 (2.3%)   | 10 (2.1%)  | 5 (1.9%)   | 2 (1.3%)   | 138 (2.9%)   |
| Missing                          | 61 (2.3%)   | 5 (2.5%) | 32 (3%)     | 14 (2.9%)  | 7 (2.7%)   | 5 (3.3%)   | 124 (2.6%)   |

| Characteristics                                                                 | Non cases                | Delayed occurrence     | Intermediate worsening   | Intermediate improving | Remission              | Stable depression      | All             |
|---------------------------------------------------------------------------------|--------------------------|------------------------|--------------------------|------------------------|------------------------|------------------------|-----------------|
|                                                                                 | <b>N = 2634 (54.84%)</b> | <b>N = 200 (4.16%)</b> | <b>N = 1076 (22.40%)</b> | <b>N = 480 (9.99%)</b> | <b>N = 261 (5.43%)</b> | <b>N = 152 (3.16%)</b> | <b>N = 4803</b> |
| <b>Household income (euros per month)</b>                                       |                          |                        |                          |                        |                        |                        |                 |
| < 1500                                                                          | 271 (10.3%)              | 35 (17.5%)             | 158 (14.7%)              | 88 (18.3%)             | 31 (11.9%)             | 37 (24.3%)             | 620 (12.9%)     |
| [1500-3000]                                                                     | 896 (34.0%)              | 86 (43.0%)             | 413 (38.4%)              | 198 (41.3%)            | 95 (36.4%)             | 66 (43.4%)             | 1754 (36.5%)    |
| > 3000                                                                          | 1221 (46.4%)             | 56 (28.0%)             | 397 (36.9%)              | 150 (31.3%)            | 107 (41.0%)            | 36 (23.7%)             | 1967 (41.0%)    |
| Missing                                                                         | 246 (9.3%)               | 23 (11.5%)             | 108 (10.0%)              | 44 (9.2%)              | 28 (10.7%)             | 13 (8.6%)              | 462 (9.6%)      |
| <b>Medical history</b>                                                          |                          |                        |                          |                        |                        |                        |                 |
| <b>Personal history of cancer</b>                                               |                          |                        |                          |                        |                        |                        |                 |
| Yes                                                                             | 222 (8.4%)               | 17 (8.5%)              | 82 (7.6%)                | 43 (9.0%)              | 15 (5.7%)              | 21 (13.8%)             | 400 (8.3%)      |
| No                                                                              | 2386 (90.6%)             | 181 (90.5%)            | 978 (90.9%)              | 434 (90.4%)            | 243 (93.1%)            | 130 (85.5%)            | 4352 (90.6%)    |
| Missing                                                                         | 26 (1.0%)                | 2 (1.0%)               | 16 (1.5%)                | 3 (0.6%)               | 3 (1.1%)               | 1 (0.7%)               | 51 (1.1%)       |
| <b>Familial history of breast cancer (1<sup>st</sup>/2<sup>nd</sup> degree)</b> |                          |                        |                          |                        |                        |                        |                 |
| 0                                                                               | 1452 (55.1%)             | 106 (53.0%)            | 542 (50.4%)              | 254 (52.9%)            | 142 (54.4%)            | 83 (54.6%)             | 2579 (53.7%)    |
| 1+                                                                              | 1136 (43.1%)             | 92 (46.0%)             | 514 (47.8%)              | 203 (42.3%)            | 116 (44.4%)            | 62 (40.8%)             | 2123 (44.2%)    |
| Missing                                                                         | 46 (1.7%)                | 2 (1.0%)               | 20 (1.9%)                | 23 (4.8%)              | 3 (1.1%)               | 7 (4.6%)               | 101 (2.1%)      |
| <b>Familial history of cancer (1<sup>st</sup>/2<sup>nd</sup>)</b>               |                          |                        |                          |                        |                        |                        |                 |
| 0                                                                               | 1378 (52.3%)             | 95 (47.5%)             | 545 (50.7%)              | 235 (49.0%)            | 134 (51.3%)            | 75 (49.3%)             | 2462 (51.3%)    |
| 1+                                                                              | 1194 (45.3%)             | 102 (51.0%)            | 505 (46.9%)              | 227 (47.3%)            | 125 (47.9%)            | 71 (46.7%)             | 2224 (46.3%)    |
| Missing                                                                         | 62 (2.4%)                | 3 (1.5%)               | 26 (2.4%)                | 18 (3.8%)              | 2 (0.8%)               | 6 (3.9%)               | 117 (2.4%)      |
| <b>Former psychiatric hospitalizations</b>                                      |                          |                        |                          |                        |                        |                        |                 |
| Yes                                                                             | 41 (1.6%)                | 12 (6.0%)              | 34 (3.2%)                | 23 (4.8%)              | 9 (3.4%)               | 12 (7.9%)              | 131 (2.7%)      |
| No                                                                              | 2552 (96.9%)             | 180 (90%)              | 1016 (94.4%)             | 445 (92.7%)            | 246 (94.3%)            | 139 (91.4%)            | 4578 (95.3%)    |
| Missing                                                                         | 41 (1.6%)                | 8 (4.0%)               | 26 (2.4%)                | 12 (2.5%)              | 6 (2.3%)               | 1 (0.7%)               | 94 (2.0%)       |

|                                     |              |             |             |             |             |            |              |
|-------------------------------------|--------------|-------------|-------------|-------------|-------------|------------|--------------|
| <b>Former psychiatric disorders</b> |              |             |             |             |             |            |              |
| Yes                                 | 302 (11.5%)  | 49 (24.5%)  | 199 (18.5%) | 109 (22.7%) | 54 (20.7%)  | 55 (36.2%) | 768 (16.0%)  |
| No                                  | 2238 (85.0%) | 146 (73.0%) | 838 (77.9%) | 354 (73.8%) | 202 (77.4%) | 96 (63.2%) | 3874 (80.7%) |
| Missing                             | 94 (3.6%)    | 5 (2.5%)    | 39 (3.6%)   | 17 (3.5%)   | 5 (1.9%)    | 1 (0.7%)   | 161 (3.4%)   |

| <b>Characteristics</b>            | <b>Non cases</b>         | <b>Delayed occurrence</b> | <b>Intermediate worsening</b> | <b>Intermediate improving</b> | <b>Remission</b>       | <b>Stable depression</b> | <b>All</b>      |
|-----------------------------------|--------------------------|---------------------------|-------------------------------|-------------------------------|------------------------|--------------------------|-----------------|
|                                   | <b>N = 2634 (54.84%)</b> | <b>N = 200 (4.16%)</b>    | <b>N = 1076 (22.40%)</b>      | <b>N = 480 (9.99%)</b>        | <b>N = 261 (5.43%)</b> | <b>N = 152 (3.16%)</b>   | <b>N = 4803</b> |
| <b>Clinical factors</b>           |                          |                           |                               |                               |                        |                          |                 |
| <b>Tumor stage</b>                |                          |                           |                               |                               |                        |                          |                 |
| Stage I                           | 1404 (53.3%)             | 81 (40.5%)                | 553 (51.4%)                   | 213 (44.4%)                   | 123 (47.1%)            | 67 (44.1%)               | 2441 (50.8%)    |
| Stage II                          | 990 (37.6%)              | 97 (48.5%)                | 432 (40.1%)                   | 208 (43.3%)                   | 113 (43.3%)            | 67 (44.1%)               | 1907 (39.7%)    |
| Stage III                         | 239 (9.1%)               | 21 (10.5%)                | 90 (8.4%)                     | 59 (12.3%)                    | 25 (9.6%)              | 18 (11.8%)               | 452 (9.4%)      |
| Missing                           | 1 (0.04%)                | 1 (0.5%)                  | 1 (0.1%)                      | .                             | .                      | .                        | 3 (0.1%)        |
| <b>Tumor subtype</b>              |                          |                           |                               |                               |                        |                          |                 |
| HR+ HER2+                         | 269 (10.2%)              | 27 (13.5%)                | 119 (11.1%)                   | 49 (10.2%)                    | 31 (11.9%)             | 11 (7.2%)                | 506 (10.5%)     |
| HR+ HER2-                         | 2005 (76.1%)             | 158 (79.0%)               | 821 (76.3%)                   | 357 (74.4%)                   | 201 (77%)              | 121 (79.6%)              | 3663 (76.3%)    |
| HR- HER2+                         | 119 (4.5%)               | 4 (2.0%)                  | 41 (3.8%)                     | 18 (3.8%)                     | 9 (3.4%)               | 6 (3.9%)                 | 197 (4.1%)      |
| HR- HER2-                         | 220 (8.4%)               | 11 (5.5%)                 | 86 (8.0%)                     | 54 (11.3%)                    | 20 (7.7%)              | 14 (9.2%)                | 505 (8.4%)      |
| Missing                           | 21 (0.8%)                | .                         | 9 (0.8%)                      | 2 (0.4%)                      | .                      | .                        | 32 (0.7%)       |
| <b>Charlson comorbidity index</b> |                          |                           |                               |                               |                        |                          |                 |
| 0                                 | 2007 (76.2%)             | 138 (69.0%)               | 806 (74.9%)                   | 323 (67.3%)                   | 191 (73.2%)            | 102 (67.1%)              | 3567 (74.3%)    |
| 1                                 | 236 (9.0%)               | 24 (12.0%)                | 97 (9.0%)                     | 63 (13.1%)                    | 24 (9.2%)              | 14 (9.2%)                | 458 (9.5%)      |
| 2+                                | 218 (8.3%)               | 22 (11.0%)                | 96 (8.9%)                     | 51 (10.6%)                    | 28 (10.7%)             | 19 (12.5%)               | 434 (9.0%)      |
| Missing                           | 173 (6.6%)               | 16 (8.0%)                 | 77 (7.2%)                     | 43 (9.0%)                     | 18 (6.9%)              | 17 (11.2%)               | 344 (7.2%)      |
| <b>Menopausal status</b>          |                          |                           |                               |                               |                        |                          |                 |
| Premenopausal                     | 945 (35.9%)              | 61 (30.5%)                | 399 (37.1%)                   | 181 (37.7%)                   | 123 (47.1%)            | 46 (30.3%)               | 1755 (36.5%)    |
| Postmenopausal                    | 1641 (62.3%)             | 134 (67.0%)               | 658 (61.2%)                   | 292 (60.8%)                   | 131 (50.2%)            | 103 (67.8%)              | 2959 (61.6%)    |
| Missing                           | 48 (1.8%)                | 5 (2.5%)                  | 19 (1.8%)                     | 7 (1.5%)                      | 7 (2.7%)               | 3 (2.0%)                 | 89 (1.9%)       |
| <b>Body Mass Index</b>            |                          |                           |                               |                               |                        |                          |                 |
| Underweight <18.5                 | 56 (2.1%)                | 4 (2.0%)                  | 25 (2.3%)                     | 9 (1.9%)                      | 8 (3.1%)               | 2 (1.3%)                 | 104 (2.2%)      |
| Normal [18.5–25[                  | 1421 (53.9%)             | 75 (37.5%)                | 467 (43.4%)                   | 198 (41.3%)                   | 139 (53.3%)            | 68 (44.7%)               | 2368 (49.3%)    |
| Overweight [25-30[                | 723 (27.4%)              | 65 (32.5%)                | 351 (32.6%)                   | 146 (30.4%)                   | 66 (25.3%)             | 44 (28.9%)               | 1395 (29%)      |

|                 |              |             |             |             |             |            |              |
|-----------------|--------------|-------------|-------------|-------------|-------------|------------|--------------|
| Obese ≥30       | 427 (16.2%)  | 56 (28.0%)  | 228 (21.2%) | 126 (26.3%) | 47 (18.0%)  | 36 (23.7%) | 920 (19.2%)  |
| Missing         | 7 (0.3%)     | .           | 5 (0.5%)    | 1 (0.2%)    | 1 (0.4%)    | 2 (1.3%)   | 16 (0.3%)    |
| <b>Symptoms</b> |              |             |             |             |             |            |              |
| <b>Pain</b>     |              |             |             |             |             |            |              |
| < 40            | 2490 (94.5%) | 172 (86.0%) | 956 (88.8%) | 372 (77.5%) | 211 (80.8%) | 93 (61.2%) | 4294 (89.4%) |
| ≥ 40            | 134 (5.1%)   | 28 (14.0%)  | 118 (11%)   | 106 (22.1%) | 48 (18.4%)  | 59 (38.8%) | 493 (10.3%)  |
| Missing         | 10 (0.4%)    | .           | 2 (0.2%)    | 2 (0.4%)    | 2 (0.8%)    | .          | 16 (0.3%)    |

| Characteristics            | Non cases                | Delayed occurrence     | Intermediate worsening   | Intermediate improving | Remission              | Stable depression      | All             |
|----------------------------|--------------------------|------------------------|--------------------------|------------------------|------------------------|------------------------|-----------------|
|                            | <b>N = 2634 (54.84%)</b> | <b>N = 200 (4.16%)</b> | <b>N = 1076 (22.40%)</b> | <b>N = 480 (9.99%)</b> | <b>N = 261 (5.43%)</b> | <b>N = 152 (3.16%)</b> | <b>N = 4803</b> |
| <b>Fatigue</b>             |                          |                        |                          |                        |                        |                        |                 |
| < 40                       | 2317 (88.0%)             | 131 (65.5%)            | 769 (71.5%)              | 237 (49.4%)            | 150 (57.5%)            | 45 (29.6%)             | 3649 (76.0%)    |
| ≥ 40                       | 311 (11.8%)              | 69 (34.5%)             | 305 (28.3%)              | 242 (50.4%)            | 109 (41.8%)            | 107 (70.4%)            | 1143 (23.8%)    |
| Missing                    | 6 (0.2%)                 | .                      | 2 (0.2%)                 | 1 (0.2%)               | 2 (0.8%)               | .                      | 11 (0.2%)       |
| <b>Insomnia</b>            |                          |                        |                          |                        |                        |                        |                 |
| Yes                        | 1841 (69.9%)             | 163 (81.5%)            | 829 (77.0%)              | 418 (87.1%)            | 228 (87.4%)            | 130 (85.5%)            | 3609 (75.1%)    |
| No                         | 768 (29.2%)              | 37 (18.5%)             | 236 (21.9%)              | 57 (11.9%)             | 30 (11.5%)             | 21 (13.8%)             | 1149 (23.9%)    |
| Missing                    | 25 (0.9%)                | .                      | 11 (1.0%)                | 5 (1.0%)               | 3 (1.1%)               | 1 (0.7%)               | 45 (0.9%)       |
| <b>Anxiety (HADS-A)</b>    |                          |                        |                          |                        |                        |                        |                 |
| Mean (SD)                  | 7.6 (3.7)                | 9.2 (3.9)              | 9.3 (3.7)                | 12.5 (3.5)             | 13.2 (3.8)             | 13.6 (4.0)             | 9.0 (4.2)       |
| Range                      | [0.0-20.0]               | [1.0-19.0]             | [0.0-20.0]               | [2.0-21.0]             | [0.0-21.0]             | [1.0-20.0]             | [0.0-21.0]      |
| [0-7]                      | 1363 (51.7%)             | 76 (38.0%)             | 361 (33.6%)              | 39 (8.1%)              | 18 (6.9%)              | 11 (7.2%)              | 1868 (38.9%)    |
| [8-10]                     | 722 (27.4%)              | 57 (28.5%)             | 327 (30.4%)              | 100 (20.8%)            | 47 (18.0%)             | 26 (17.1%)             | 1279 (26.6%)    |
| ≥ 11                       | 545 (20.7%)              | 66 (33.0%)             | 388 (36.1%)              | 341 (71.0%)            | 196 (75.1%)            | 115 (75.7%)            | 1651 (34.4%)    |
| Missing                    | 4 (0.2%)                 | 1 (0.5%)               | .                        | .                      | .                      | .                      | 5 (0.1%)        |
| <b>Depression (HADS-D)</b> |                          |                        |                          |                        |                        |                        |                 |
| Mean (SD)                  | 2.2 (2.0)                | 4.3 (2.2)              | 4.1 (2.2)                | 9.2 (2.3)              | 10.2 (2.2)             | 12.5 (2.9)             | 4.2 (3.7)       |
| Range                      | [0.0-8.0]                | [0.0-9.0]              | [0.0-10.0]               | [3.0-17.0]             | [7.0-19.0]             | [6.0-21.0]             | [0.0-21.0]      |
| [0-4]                      | 2253 (85.5%)             | 100 (50.0%)            | 592 (55.0%)              | 4 (0.8%)               | .                      | .                      | 2949 (61.4%)    |
| [5-7]                      | 358 (13.6%)              | 88 (44.0%)             | 439 (40.8%)              | 100 (20.8%)            | 8 (3.1%)               | 4 (2.6%)               | 997 (20.8%)     |
| [8-10]                     | 23 (0.9%)                | 12 (6.0%)              | 45 (4.2%)                | 248 (51.7%)            | 161 (61.7%)            | 34 (22.4%)             | 523 (10.9%)     |
| ≥ 11                       | .                        | .                      | .                        | 128 (26.7%)            | 92 (35.2%)             | 114 (75.0%)            | 334 (7.0%)      |
| Missing                    | 4 (0.2%)                 | 1 (0.5%)               | .                        | .                      | .                      | .                      | 5 (0.1%)        |

| <b>Depression (BDI-SF)</b> |             |            |             |             |             |            |              |
|----------------------------|-------------|------------|-------------|-------------|-------------|------------|--------------|
| Mean                       | 1.9 (2.2)   | 4.8 (3.5)  | 3.8 (3.1)   | 8.1 (5.0)   | 6.8 (4.0)   | 13.0 (6.5) | 3.7 (4.1)    |
| Range                      | [0.0-15.0]  | [0.0-18.0] | [0.0-25.0]  | [0.0-38.0]  | [0.0-20.0]  | [0.0-36.0] | [0.0-38.0]   |
| [0-3]                      | 2137 (82%)  | 84 (42.0%) | 583 (54.7%) | 74 (15.6%)  | 50 (19.4%)  | 3 (2.0%)   | 2931 (61.7%) |
| [4-7]                      | 399 (15.3%) | 75 (37.5%) | 354 (33.2%) | 188 (39.6%) | 118 (45.7%) | 31 (21.1%) | 1165 (24.5%) |
| [8-15]                     | 70 (2.7%)   | 40 (20.0%) | 125 (11.7%) | 174 (36.6%) | 81 (31.4%)  | 72 (49.0%) | 562 (11.8%)  |
| ≥ 16                       | 0 (0.0%)    | 1 (0.5%)   | 3 (0.3%)    | 39 (8.2%)   | 9 (3.5%)    | 41 (27.9%) | 93 (2.0%)    |
| Missing                    | 28 (1.2%)   | .          | 11 (1.0%)   | 5 (1.0%)    | 3 (1.1%)    | 5 (3.3%)   | 52 (1.1%)    |

| <b>Characteristics</b>                     | <b>Non cases</b>         | <b>Delayed occurrence</b> | <b>Intermediate worsening</b> | <b>Intermediate improving</b> | <b>Remission</b>       | <b>Stable depression</b> | <b>All</b>      |
|--------------------------------------------|--------------------------|---------------------------|-------------------------------|-------------------------------|------------------------|--------------------------|-----------------|
|                                            | <b>N = 2634 (54.84%)</b> | <b>N = 200 (4.16%)</b>    | <b>N = 1076 (22.40%)</b>      | <b>N = 480 (9.99%)</b>        | <b>N = 261 (5.43%)</b> | <b>N = 152 (3.16%)</b>   | <b>N = 4803</b> |
| <b>Lifestyle factors</b>                   |                          |                           |                               |                               |                        |                          |                 |
| <b>Alcohol consumption</b>                 |                          |                           |                               |                               |                        |                          |                 |
| Daily                                      | 341 (12.9%)              | 23 (11.5%)                | 154 (14.3%)                   | 72 (15.0%)                    | 30 (11.5%)             | 26 (17.1%)               | 646 (13.4%)     |
| Less than daily                            | 2222 (84.4%)             | 170 (85.0%)               | 890 (82.7%)                   | 394 (82.1%)                   | 226 (86.6%)            | 119 (78.3%)              | 4021 (83.7%)    |
| Missing                                    | 71 (2.7%)                | 7 (3.5%)                  | 32 (3.0%)                     | 14 (2.9%)                     | 5 (1.9%)               | 7 (4.6%)                 | 136 (2.8%)      |
| <b>Smoking status</b>                      |                          |                           |                               |                               |                        |                          |                 |
| Non smoker                                 | 1690 (64.2%)             | 121 (60.5%)               | 635 (59.0%)                   | 280 (58.3%)                   | 148 (56.7%)            | 70 (46.1%)               | 2944 (61.3%)    |
| Former smoker                              | 573 (21.8%)              | 40 (20.0%)                | 217 (20.2%)                   | 99 (20.6%)                    | 66 (25.3%)             | 36 (23.7%)               | 1031 (21.5%)    |
| Smoker                                     | 325 (12.3%)              | 37 (18.5%)                | 206 (19.1%)                   | 97 (20.2%)                    | 44 (16.9%)             | 44 (28.9%)               | 753 (15.7%)     |
| Missing                                    | 46 (1.7%)                | 2 (1.0%)                  | 18 (1.7%)                     | 4 (0.8%)                      | 3 (1.1%)               | 2 (1.3%)                 | 75 (1.6%)       |
| <b>Physical activity (MET-mn per week)</b> |                          |                           |                               |                               |                        |                          |                 |
| < 600                                      | 997 (37.9%)              | 92 (46%)                  | 437 (40.6%)                   | 226 (47.1%)                   | 123 (47.1%)            | 91 (59.9%)               | 1966 (40.9%)    |
| ≥ 600                                      | 1620 (61.5%)             | 104 (52%)                 | 627 (58.3%)                   | 243 (50.6%)                   | 134 (51.3%)            | 58 (38.2%)               | 2786 (58%)      |
| Missing                                    | 17 (0.6%)                | 4 (2.0%)                  | 12 (1.1%)                     | 11 (2.3%)                     | 4 (1.5%)               | 3 (2.0%)                 | 51 (1.1%)       |
| <b>Body image (BRBI)</b>                   |                          |                           |                               |                               |                        |                          |                 |
| Mean (SD)                                  | 93.4 (13.5)              | 85.8 (21.6)               | 87.6 (19.2)                   | 76.8 (26.8)                   | 78.5 (24.1)            | 63.2 (31.1)              | 88.4 (19.7)     |
| < 100                                      | 770 (29.2%)              | 90 (45.0%)                | 467 (43.4%)                   | 300 (62.5%)                   | 157 (60.2%)            | 112 (73.7%)              | 1896 (39.5%)    |
| = 100                                      | 1792 (68.0%)             | 104 (52.0%)               | 571 (53.1%)                   | 166 (34.6%)                   | 91 (34.9%)             | 34 (22.4%)               | 2758 (57.4%)    |
| Missing                                    | 72 (2.7%)                | 6 (3.0%)                  | 38 (3.5%)                     | 14 (2.9%)                     | 13 (5.0%)              | 6 (3.9%)                 | 149 (3.1%)      |



SD, Standard Deviation; HR, Hormone Receptor; HER2, Human Epidermal Growth Factor Receptor 2; HADS, Hospital Anxiety and Depression Scale; BDI-SF, Beck Depression Scale Short-Form; MET-mn, Metabolic-equivalent of task-minute; BRBI, Breast-related body image, 4-item subscale of EORTC QLQ-C3.
